# Supplementary material for: Simultaneous coupling of metal removal and visual detection by nature-inspired polyphenol-amine surface chemistry
Source: Royal Society of Chemistry journal article supplement (doi:10.1039/d3sm01363d), 2024-01-01
Supplement: d3sm01363d1.pdf [file d3sm01363d1.pdf]

## Supplementary Information

# Simultaneous Coupling of Metal Removal and Visual Detection by Nature-inspired Polyphenol-amine Surface Chemistry

*Helen H. Ju, Hong K. Park, Jingxian Wu, Yu Ri Nam, Eunu Kim, Jeongin Seo, and Haeshin Lee\**

Department of Chemistry, Korea Advanced Institute of Science and Technology, Daejeon,  
South Korea

\*Corresponding author:

Haeshin Lee, haeshin@kaist.ac.kr

### **The PDF file includes:**

**Table S1.** Parameters of pseudo-second order kinetics model

**Table S2.** Parameters of pseudo-first order kinetics model

**Table S3.** Parameters of Langmuir isotherm model

**Table S4.** Parameters of Freundlich isotherm model

## Supporting Tables

| R <sup>2</sup> | m       | b      | K <sub>2</sub> (g/mg) | q <sub>e,cal</sub> (mg/g) | q <sub>e,exp</sub> (mg/g) |
|----------------|---------|--------|-----------------------|---------------------------|---------------------------|
| 0.99929        | 1.92631 | 0.6415 | 5.784365107           | 0.519127243               | 0.551508211               |

**Table S1.** Parameters of pseudo-second order kinetics model.

| R <sup>2</sup> | m        | b        | K <sub>1</sub> (1/min) | q <sub>e,cal</sub> (mg/g) | q <sub>e,exp</sub> (mg/g) |
|----------------|----------|----------|------------------------|---------------------------|---------------------------|
| 0.82033        | -0.09836 | -1.86136 | 0.09836                | 0.155461059               | 0.551508211               |

**Table S2.** Parameters of pseudo-first order kinetics model.

| R <sup>2</sup> | m       | b         | K <sub>L</sub> (L/mg) | q <sub>max</sub> (mg/g) |
|----------------|---------|-----------|-----------------------|-------------------------|
| 0.99843        | 6.53776 | -30.17798 | -0.21664008           | 0.152957588             |

**Table S3.** Parameters of Langmuir isotherm model

| R <sup>2</sup> | m        | b       | K <sub>f</sub> (L/mg) | 1/n         |
|----------------|----------|---------|-----------------------|-------------|
| 0.99914        | -2.15987 | 3.39942 | 29.94672591           | -0.46299082 |

**Table S4.** Parameters of Freundlich isotherm model
